# Supplementary material for: Budesonide Multimatrix Is Efficacious for Mesalamine-refractory, Mild to Moderate Ulcerative Colitis: A Randomised, Placebo-controlled Trial
Source: PubMed Central journal article supplement (PMC5881669; doi:10.1093/ecco-jcc/jjx032), 2017-03-04

**Supplementary Data for “Budesonide Multi-Matrix Is Efficacious for Mesalamine-  
Refractory, Mild to Moderate Ulcerative Colitis: A Randomized, Placebo-Controlled  
Trial”**

David T. Rubin, Russell D. Cohen, William J. Sandborn, Gary R. Lichtenstein, Jeffrey Axler,

Robert H. Riddell, Cindy Zhu, Andrew C. Barrett, Enoch Bortey, William P. Forbes

**Supplementary Table 1.** Biomarker concentrations [mITT population]

| Assessment time                           | Budesonide MMX [ <i>n</i> = 230] | Placebo [ <i>n</i> = 228] | <i>P</i> value <sup>a</sup> |
|-------------------------------------------|----------------------------------|---------------------------|-----------------------------|
| Serum C-reactive protein, mg/L, mean [SD] |                                  |                           |                             |
| Baseline                                  | 8.4 [11.3]                       | 9.2 [13.1]                |                             |
| Week 8                                    | 8.6 [16.9]                       | 6.4 [8.7] <sup>b</sup>    | 0.67                        |
| Fecal calprotectin, mg/kg, mean [SD]      |                                  |                           |                             |
| Baseline                                  | 525.1 [459.6]                    | 594.0 [869.6]             |                             |
| Week 8                                    | 379.8 [362.2]                    | 431.8 [382.7]             | 0.26                        |

mITT, modified intent-to-treat; SD, standard deviation.

<sup>a</sup>*P* value for the difference in change from baseline between groups.

<sup>b</sup>Data available for 227 patients.

**Supplementary Table 2.** IBD-QOL scores [mITT population]

| Assessment time                                      | Budesonide MMX<br>[ <i>n</i> = 230] | Placebo<br>[ <i>n</i> = 228] <sup>a</sup> | <i>P</i> value <sup>b</sup> |
|------------------------------------------------------|-------------------------------------|-------------------------------------------|-----------------------------|
| Total IBD-QOL score, mean [SD]                       |                                     |                                           |                             |
| Baseline                                             | 132.8 [31.4]                        | 134.1 [32.5]                              |                             |
| Week 2                                               | 157.1 [31.6]                        | 155.7 [32.6]                              | 0.32                        |
| Week 4                                               | 164.6 [34.4]                        | 160.2 [35.1]                              | 0.04                        |
| Week 8                                               | 163.9 [39.4]                        | 165.8 [36.8]                              | 0.88                        |
| IBD-QOL bowel function subscale score, mean [SD]     |                                     |                                           |                             |
| Baseline                                             | 40.5 [9.5]                          | 40.5 [9.7]                                |                             |
| Week 2                                               | 49.2 [10.3] <sup>b</sup>            | 48.0 [10.1]                               | 0.2                         |
| Week 4                                               | 52.4 [11.5]                         | 50.0 [10.9]                               | 0.02                        |
| Week 8                                               | 52.2 [13.2]                         | 52.2 [11.8]                               | 1.0                         |
| IBD-QOL emotional function subscale score, mean [SD] |                                     |                                           |                             |
| Baseline                                             | 49.9 [13.5]                         | 50.7 [14.1]                               |                             |
| Week 2                                               | 57.9 [13.5] <sup>c</sup>            | 58.5 [13.7]                               | 0.54                        |
| Week 4                                               | 60.3 [13.9]                         | 59.7 [14.6]                               | 0.13                        |
| Week 8                                               | 59.8 [15.6]                         | 61.4 [14.8]                               | 0.54                        |
| IBD-QOL systemic symptoms subscale score, mean [SD]  |                                     |                                           |                             |
| Baseline                                             | 20.2 [5.3]                          | 20.1 [5.7]                                |                             |
| Week 2                                               | 23.6 [5.1] <sup>c</sup>             | 22.9 [5.6]                                | 0.24                        |
| Week 4                                               | 24.3 [5.5]                          | 23.7 [5.8]                                | 0.28                        |
| Week 8                                               | 24.3 [6.1]                          | 24.6 [5.9]                                | 0.3                         |
| IBD-QOL social function subscale score, mean [SD]    |                                     |                                           |                             |
| Baseline                                             | 22.2 [7.1]                          | 22.8 [7.5]                                |                             |
| Week 2                                               | 26.3 [6.5] <sup>c</sup>             | 26.2 [7.1]                                | 0.2                         |
| Week 4                                               | 27.6 [6.6]                          | 26.8 [7.4]                                | 0.01                        |
| Week 8                                               | 27.6 [7.4]                          | 27.6 [7.3]                                | 0.16                        |

<sup>a</sup>For total score and each subscale score, data available from 226 patients at baseline and week 2, and from 227 patients at weeks 4 and 8.

<sup>b</sup>*P* value for difference between groups in change from baseline.

<sup>c</sup>Data available for 228 patients.

IBD-QOL = inflammatory bowel disease quality of life; mITT = modified intent-to-treat population; SD = standard deviation.

**Supplementary Table 3.** Morning cortisol levels [safety population]

| Assessment time | Budesonide MMX [ <i>n</i> = 255] |                  | Placebo [ <i>n</i> = 255] |                  |
|-----------------|----------------------------------|------------------|---------------------------|------------------|
|                 | Mean [SD],<br>µg/dL              | Median,<br>µg/dL | Mean [SD],<br>µg/dL       | Median,<br>µg/dL |
| Baseline        | 12.5 [4.8]                       | 12.0             | 12.0 [4.9]                | 11.0             |
| Week 2          | 7.3 [5.2]                        | 7.0              | 11.8 [4.5]                | 11.0             |
| Week 4          | 7.3 [5.4]                        | 7.0              | 12.4 [4.5]                | 12.0             |
| Week 8          | 8.8 [6.5]                        | 8.0              | 12.7 [4.6]                | 12.5             |

### Supplementary Figure 1. Study design

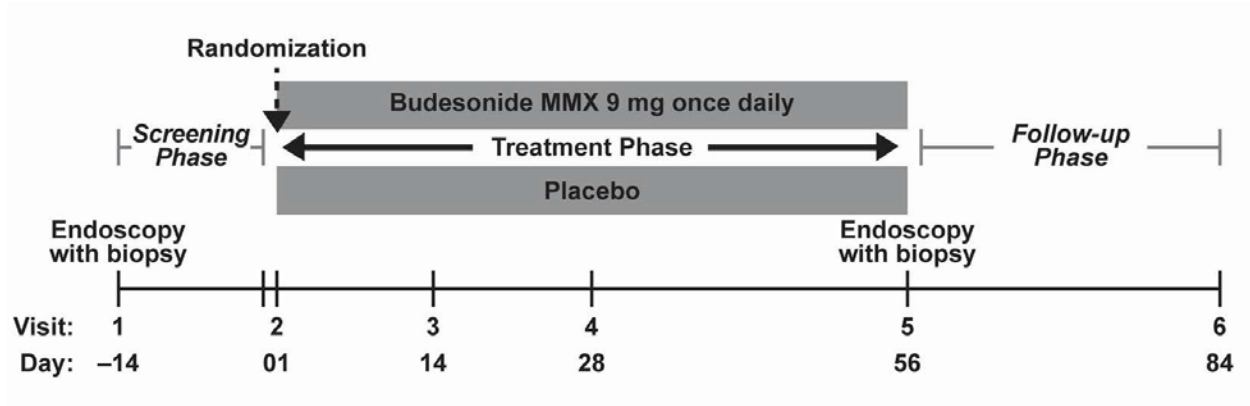

Supplement: jjx032_suppl_supplementary_material.pdf [file jjx032_suppl_supplementary_material.pdf]
